# Supplementary material
Source: ML conference proceedings conference paper supplement (https://openreview.net/forum?id=OhQLdb4seO)
Supplement: supplementary_material [file attachment]

# Supplementary Materials: Efficient and High-Quality Text-to-Audio Generation with Minimal Inference Steps

Huadai Liu  
Zhejiang University  
Shanghai Artificial Intelligence  
Laboratory  
liuhuadai@zju.edu.cn

Rongjie Huang  
Zhejiang University  
rongjiehuang@zju.edu.cn

Yang Liu  
Zhejiang University  
22160155@zju.edu.cn

Hengyuan Cao  
Zhejiang University  
caohy@zju.edu.cn

Jialei Wang  
Zhejiang University  
3220101016@zju.edu.cn

Xize Cheng  
Zhejiang University  
xizecheng@zju.edu.cn

Siqi Zheng  
Alibaba Group  
zsqi174630@alibaba-inc.com

Zhou Zhao<sup>†</sup>  
Zhejiang University  
Shanghai Artificial Intelligence  
Laboratory  
zhaozhou@zju.edu.cn

## 1 DATASET DESCRIPTIONS

As shown in Table 2, we collect a large-scale audio-text dataset consisting of 0.92 million of audio samples with a total duration of approximately 3.7k hours. For text-to-music generation, we use the LP-MusicCaps for training. For Clotho dataset, we only use its evaluation set for zero-shot testing and do not use for training. For text-to-audio generation, we filter 95% of the samples that contain speech and music to build a more balanced dataset, as speech and music are the dominant classes in AudioSet.

## 2 ARCHITECTURE

We list the model hyper-parameters of AudioLCM in Table 1.

| Hyperparameter                           |                            | AudioLCM  |
|------------------------------------------|----------------------------|-----------|
| Spectrogram Autoencoders                 | Input/Output Channels      | 80        |
|                                          | Hidden Channels            | 20        |
|                                          | Residual Blocks            | 2         |
|                                          | Spectrogram Size           | 80 × 624  |
|                                          | Channel Mult               | [1, 2, 4] |
| Transformer Backbone                     | Input shape                | (20, T)   |
|                                          | Condition Embed Dim        | 1024      |
|                                          | Feed-forward Hidden Size   | 576       |
|                                          | Transformer Heads          | 8         |
|                                          | Transformer Blocks         | 8         |
|                                          | Sampling Steps             | 2         |
| CLAP Text Encoder                        | Transformer Embed Channels | 768       |
|                                          | Output Project Channels    | 1024      |
|                                          | Token Length               | 77        |
| Total Number of Non-trainable Parameters |                            | 984M      |
| Total Number of Trainable Parameters     |                            | 159M      |

Table 1: Hyperparameters of AudioLCM models.

## 3 EVALUATION

### 3.1 Subjective evaluation

To assess the generation quality, we conduct MOS (Mean Opinion Score) tests regarding audio quality and text-audio faithfulness, respectively scoring MOS-Q and MOS-F.

For audio quality, the raters were explicitly instructed to “focus on examining the audio quality and naturalness.” The testers were presented with audio samples and asked to rate their subjective score (MOS-P) on a 20-100 Likert scale.

For text-audio faithfulness, human raters were shown the audio and its caption and asked to respond to the question, “Does the natural language description align with the audio faithfully?” They had to choose one of the options - “completely,” “mostly,” or “somewhat” on a 20-100 Likert scale.

Our crowd-sourced subjective evaluation tests were conducted via Amazon Mechanical Turk where participants were paid \$8 hourly. A small subset of the generated audio samples used in the test can be found at <https://Echo-Audio.github.io/>.

### 3.2 Objective evaluation

Fréchet Audio Distance (FAD) [7] is adapted from the Fréchet Inception Distance (FID) to the audio domain, it is a reference-free perceptual metric that measures the distance between the generated and ground truth audio distributions. FAD is used to evaluate the quality of generated audio.

KL divergence is measured at a paired sample level between the generated audio and the ground truth audio, it is computed using the label distribution and is averaged as the final result.

CLAP score: adapted from the CLIP score [5, 14] to the audio domain and is a reference-free evaluation metric to measure audio-text alignment for this work that closely correlates with human perception.

## 4 DETAILED FORMULATION OF DDPM

As a blossoming class of generative models, denoising diffusion probabilistic models (DDPMs) [6, 16] has emerged to prove its capability to achieve leading performances in both image and audio syntheses [9, 17]. We define the data distribution as  $q(\mathbf{x}_0)$ . The diffusion process is defined by a fixed Markov chain from data  $\mathbf{x}_0$  to the latent variable  $\mathbf{x}_T$ :

$$q(\mathbf{x}_1, \dots, \mathbf{x}_T | \mathbf{x}_0) = \prod_{t=1}^T q(\mathbf{x}_t | \mathbf{x}_{t-1}), \quad (1)$$

For a small positive constant  $\beta_t$ , a small Gaussian noise is added from  $\mathbf{x}_{t-1}$  to the distribution of  $\mathbf{x}_t$  under the function of  $q(\mathbf{x}_t | \mathbf{x}_{t-1})$ .

The whole process gradually converts data  $\mathbf{x}_0$  to whitened latents  $\mathbf{x}_T$  according to the fixed noise schedule  $\beta_1, \dots, \beta_T$ , where  $\epsilon \sim \mathcal{N}(\mathbf{0}, I)$ :

$$q(\mathbf{x}_t | \mathbf{x}_{t-1}) := \mathcal{N}(\mathbf{x}_t; \sqrt{1 - \beta_t} \mathbf{x}_{t-1}, \beta_t I) \quad (2)$$

Efficient training is optimizing a random term of  $t$  with stochastic gradient descent:

$$\mathcal{L}_\theta = \left\| \epsilon_\theta \left( \alpha_t \mathbf{x}_0 + \sqrt{1 - \alpha_t^2} \epsilon \right) - \epsilon \right\|_2^2 \quad (3)$$

Unlike the diffusion process, the reverse process is to recover samples from Gaussian noises. The reverse process is a Markov chain from  $\mathbf{x}_T$  to  $\mathbf{x}_0$  parameterized by shared  $\theta$ :

$$p_\theta(\mathbf{x}_0, \dots, \mathbf{x}_{T-1} | \mathbf{x}_T) = \prod_{t=1}^T p_\theta(\mathbf{x}_{t-1} | \mathbf{x}_t), \quad (4)$$

where each iteration eliminates the Gaussian noise added in the diffusion process:

$$p_\theta(\mathbf{x}_{t-1} | \mathbf{x}_t) := \mathcal{N}(\mathbf{x}_{t-1}; \mu_\theta(\mathbf{x}_t, t), \sigma_\theta(\mathbf{x}_t, t)^2 I) \quad (5)$$

## 5 IMPLEMENTATION DETAILS

### 5.1 Ablation Studies on Novel Transformer Backbone

We further investigate the efficacy of the LLaMA architectures on the AudioLCM model applied to the audiocaps dataset, as depicted in Table 3. Remarkably, all incorporated designs within the transformer architecture exhibit enhancements in the performance of our AudioLCM system, with particular prominence observed in the case of Rotary Embeddings.

### 5.2 Analyses about Scalable Transformer

During the training phase of the original diffusion transformer, we encountered instability issues, particularly evident when utilizing low-bit training models and scaling up parameters. We investigate the performance of a novel transformer backbone designed to scale up the trainable parameters, as showcased in Table 4. The outcomes suggest a notable improvement in AudioLCM's performance following parameter scaling-up, underscoring the potential of scaled-up transformers for augmenting system performance.

## 6 POTENTIAL NEGATIVE SOCIETAL IMPACTS

This paper aims to achieve efficient and high-quality text-to-audio generation, which makes generative models practically applicable to text-to-audio generation deployment. A negative impact is the risk of misinformation. To alleviate it, we can train an additional classifier to discriminate the fakes. We believe the benefits outweigh the downsides.

AudioLCM lowers the requirements for fast and high-quality text-to-audio synthesis, which may cause unemployment for people with related occupations, such as sound engineers and radio hosts. In addition, there is the potential for harm from non-consensual voice cloning or the generation of fake media, and the voices in the recordings might be overused than they expect.

## 7 LIMITATIONS

AudioLCM adopts multi-step consistency sampling which evaluate AudioLCM multiple times by alternating denoising and noise injection steps for improved sample quality. However, this enhancement disappeared when sampling steps is larger than ten steps. It is because the discretisation errors accumulated during the sampling phase. One of our future directions is to solve this problem.

| Dataset                      | Hours   | Type        | Source                                                                                                                                                          |
|------------------------------|---------|-------------|-----------------------------------------------------------------------------------------------------------------------------------------------------------------|
| Audiocaps                    | 109hrs  | caption     | [8]                                                                                                                                                             |
| WavCaps                      | 2056hrs | caption     | [11]                                                                                                                                                            |
| WavText5K                    | 25hrs   | caption     | [1]                                                                                                                                                             |
| MACS                         | 48hrs   | caption     | [10]                                                                                                                                                            |
| Clothv2                      | 152hrs  | caption     | [3]                                                                                                                                                             |
| Audiostock                   | 44hrs   | caption     | <a href="https://audiostock.net">https://audiostock.net</a>                                                                                                     |
| epidemic sound               | 220hrs  | caption     | <a href="https://www.epidemicsound.com">https://www.epidemicsound.com</a>                                                                                       |
| Adobe Audition Sound Effects | 26hrs   | caption     | <a href="https://www.adobe.com/products/audition/offers/AdobeAuditionDLCSEFX.html">https://www.adobe.com/products/audition/offers/AdobeAuditionDLCSEFX.html</a> |
| LP-MusicCaps                 | 5673hrs | caption     | [2]                                                                                                                                                             |
| FSD50K                       | 108hrs  | label       | <a href="https://annotator.freesound.org/fsd">https://annotator.freesound.org/fsd</a>                                                                           |
| ODEON_Sound_Effects          | 20hrs   | label       | <a href="https://www.paramountmotion.com/odeon-sound-effects">https://www.paramountmotion.com/odeon-sound-effects</a>                                           |
| UrbanSound8K                 | 9hrs    | label       | [15]                                                                                                                                                            |
| ESC-50                       | 3hrs    | label       | [13]                                                                                                                                                            |
| filteraudioset               | 945hrs  | multi label | [4]                                                                                                                                                             |
| TUT                          | 13hrs   | label       | [12]                                                                                                                                                            |

Table 2: Statistics for the Datasets used in the paper.

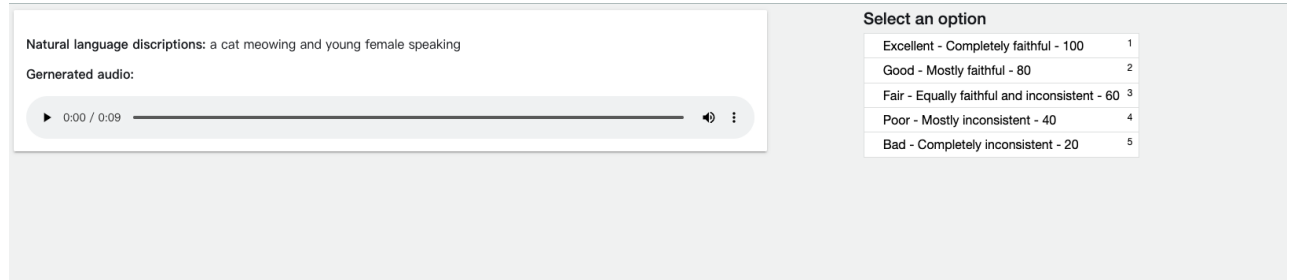

(a) Screenshot of MOS-F testing.

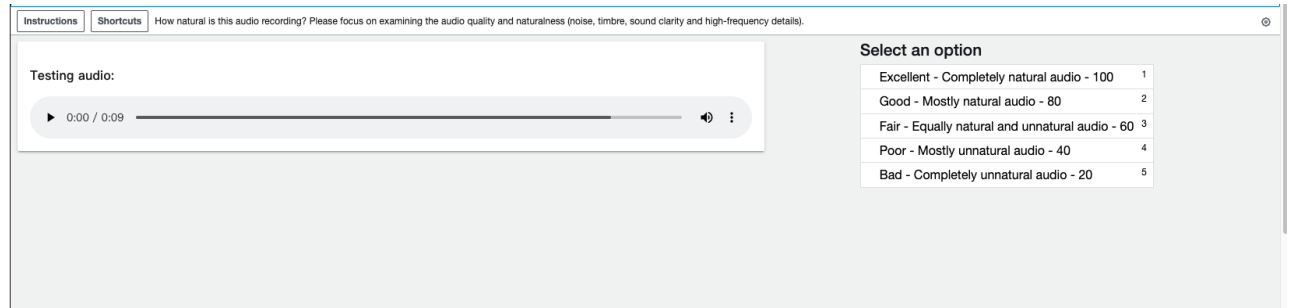

(b) Screenshot of MOS-Q testing.

Figure 1: Screenshots of subjective evaluations.

| Method      | FAD         | KL          |
|-------------|-------------|-------------|
| AudioLCM    | <b>1.67</b> | <b>1.37</b> |
| w/o RoPE    | 1.80        | 1.45        |
| w/o RMSNorm | 1.74        | 1.41        |
| w/o SwiGLU  | 1.78        | 1.40        |

Table 3: Comparison of audio quality in the ablation study with LLaMA designs. RoPE denotes Rotary Embeddings.

| Model       | Parameters | FAD  | KL   |
|-------------|------------|------|------|
| AudioLCM-B  | 159M       | 1.67 | 1.37 |
| AudioLCM-M  | 561M       | 1.62 | 1.33 |
| AudioLCM-L  | 996M       | 1.53 | 1.30 |
| AudioLCM-XL | 2.4B       | 1.50 | 1.28 |

**Table 4: AudioLCM-B, AudioLCM-M, AudioLCM-L, and AudioLCM-XL respectively represent the base, medium, large, and extra large models of AudioLCM. The presented figures only account for trainable parameters, i.e., those within the transformer architecture, evaluated on AudioCaps.**

## REFERENCES

- [1] Soham Deshmukh, Benjamin Elizalde, and Huaming Wang. 2022. Audio retrieval with wavtext5k and clap training. *arXiv preprint arXiv:2209.14275* (2022).
- [2] SeungHeon Doh, Keunwoo Choi, Jongpil Lee, and Juhan Nam. 2023. LP-MusicCaps: LLM-Based Pseudo Music Captioning. *arXiv:2307.16372 [cs.SD]*
- [3] Konstantinos Drossos, Samuel Lipping, and Tuomas Virtanen. [n. d.]. Clotho: An Audio Captioning Dataset. In *ICASSP 2020-2020 IEEE International Conference on Acoustics, Speech and Signal Processing (ICASSP)* (2020). 736–740.
- [4] Jort F Gemmeke, Daniel PW Ellis, Dylan Freedman, Aren Jansen, Wade Lawrence, R Channing Moore, Manoj Plakal, and Marvin Ritter. [n. d.]. Audio Set: An Ontology and Human-Labeled Dataset for Audio Events. In *2017 IEEE International Conference on Acoustics, Speech and Signal Processing (ICASSP)* (2017). 776–780.
- [5] Jack Hessel, Ari Holtzman, Maxwell Forbes, Ronan Le Bras, and Yejin Choi. 2021. CLIPScore: A Reference-free Evaluation Metric for Image Captioning. In *EMNLP*.
- [6] Jonathan Ho, Ajay Jain, and Pieter Abbeel. [n. d.]. Denoising Diffusion Probabilistic Models. In *Proc. of NeurIPS* (2020).
- [7] Kevin Kilgour, Mauricio Zuluaga, Dominik Roblek, and Matthew Sharifi. 2018. Fr  chet Audio Distance: A Metric for Evaluating Music Enhancement Algorithms. *arXiv preprint arXiv:1812.08466* (2018).
- [8] Chris Dongjoo Kim, Byeongchang Kim, Hyunmin Lee, and Gunhee Kim. [n. d.]. AudioCaps: Generating Captions for Audios in the Wild. In *Proceedings of the 2019 Conference of the North American Chapter of the Association for Computational Linguistics: Human Language Technologies, Volume 1 (Long and Short Papers)* (2019). 119–132.
- [9] Huadai Liu, Rongjie Huang, Xuan Lin, Wenqiang Xu, Maozong Zheng, Hong Chen, Jinzheng He, and Zhou Zhao. 2023. Vit-tts: visual text-to-speech with scalable diffusion transformer. *arXiv preprint arXiv:2305.12708* (2023).
- [10] Irene Martin-Morat   and Annamaria Mesaros. [n. d.]. What Is the Ground Truth? Reliability of Multi-Annotator Data for Audio Tagging. In *2021 29th European Signal Processing Conference (EUSIPCO)* (2021). 76–80.
- [11] Xinhao Mei, Chutong Meng, Haohe Liu, Qiuqiang Kong, Tom Ko, Chengqi Zhao, Mark D. Plumbley, Yuxian Zou, and Wenwu Wang. [n. d.]. WavCaps: A ChatGPT-Assisted Weakly-Labelled Audio Captioning Dataset for Audio-Language Multimodal Research. *arXiv:2303.17395 [eess.AS]*
- [12] Annamaria Mesaros, Toni Heittola, and Tuomas Virtanen. 2016. TUT database for acoustic scene classification and sound event detection. In *2016 24th european signal processing conference (EUSIPCO)*. 1128–1132. <https://doi.org/10.1109/EUSIPCO.2016.7760424>
- [13] Karol J Piczak. [n. d.]. ESC: Dataset for Environmental Sound Classification. In *Proceedings of the 23rd ACM International Conference on Multimedia* (2015). 1015–1018.
- [14] Alec Radford, Jong Wook Kim, Chris Hallacy, Aditya Ramesh, Gabriel Goh, Sandhini Agarwal, Girish Sastry, Amanda Askell, Pamela Mishkin, Jack Clark, Gretchen Krueger, and Ilya Sutskever. 2021. Learning Transferable Visual Models From Natural Language Supervision. *arXiv:2103.00020 [cs.CV]*
- [15] J. Salamon, C. Jacoby, and J. P. Bello. [n. d.]. A Dataset and Taxonomy for Urban Sound Research. In *22nd ACM International Conference on Multimedia (ACM-MM’14)* (Orlando, FL, USA, 2014-11). 1041–1044.
- [16] Jiaming Song, Chenlin Meng, and Stefano Ermon. 2020. Denoising Diffusion Implicit Models. In *Proc. of ICLR*.
- [17] Jiahao Xun, Shengyu Zhang, Zhou Zhao, Jieming Zhu, Qi Zhang, Jingjie Li, Xiuqiang He, Xiaofei He, Tat-Seng Chua, and Fei Wu. 2021. Why do we click: visual impression-aware news recommendation. In *Proceedings of the 29th ACM International Conference on Multimedia*. 3881–3890.
